# Supplementary material for: Liquid–liquid phase separation and crystallization of aspirin polymorphs from a water–acetonitrile mixed solvent medium through a swift cooling process
Source: Royal Society of Chemistry journal article supplement (doi:10.1039/d3ce00611e), 2023-01-01
Supplement: d3ce00611e1.pdf [file d3ce00611e1.pdf]

## Supplementary information

### Liquid-Liquid Phase Separation and Crystallization of Aspirin Polymorphs from Water-Acetonitrile Mixed Solvent medium through Swift Cooling Process

Ramya Muthusamy<sup>a</sup> and Srinivasan Karuppanan<sup>a,\*</sup>

Crystal Growth Laboratory, Department of Physics, School of Physical Sciences, Bharathiar University, Coimbatore-641046, Tamil Nadu, India

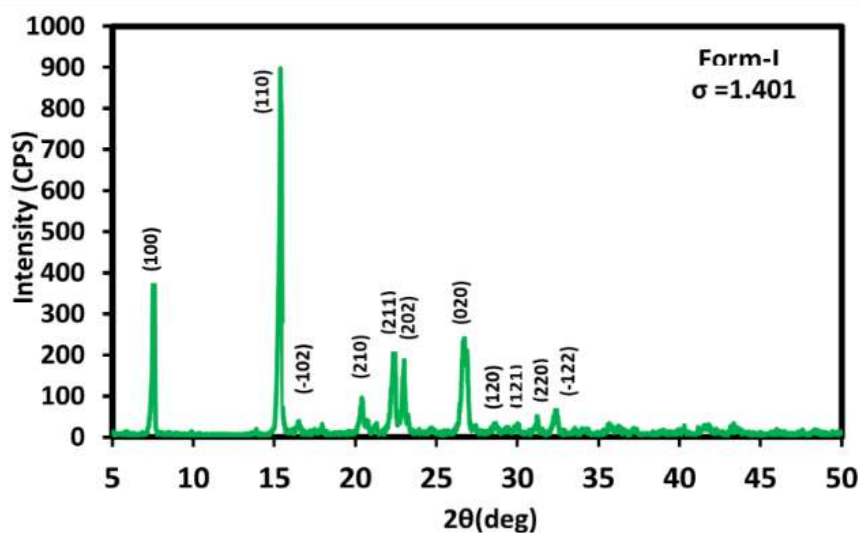

Fig S1. PXRD pattern of the grown aspirin polymorphic Form-I by swift cooling crystallization process from acetonitrile-rich mixing composition (0.24W:0.76A).

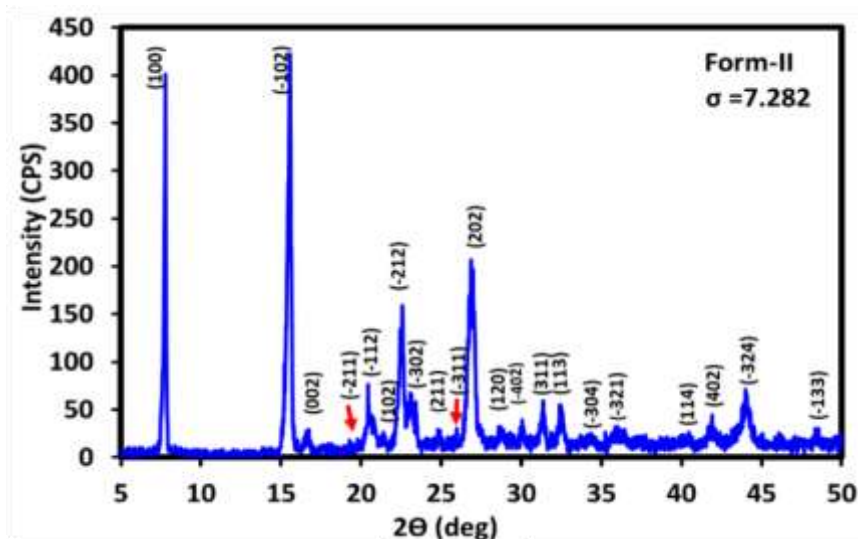

Fig S2. PXRD pattern of the grown aspirin polymorphic Form-II by swift cooling crystallization process from acetonitrile-rich mixing composition (0.24W:0.76A).

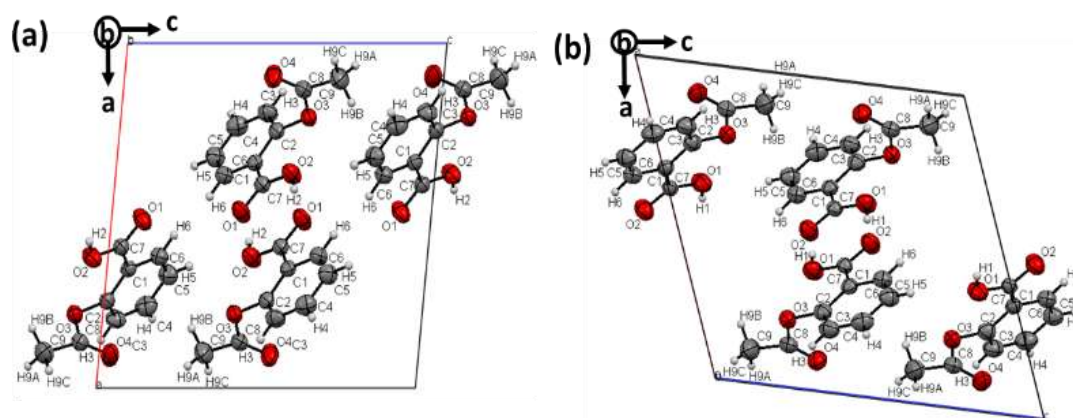

**Fig S3.** Unit cell packing diagram of aspirin polymorphic forms refined through SCXRD analysis, (a) Form-I, and (b) Form-II.

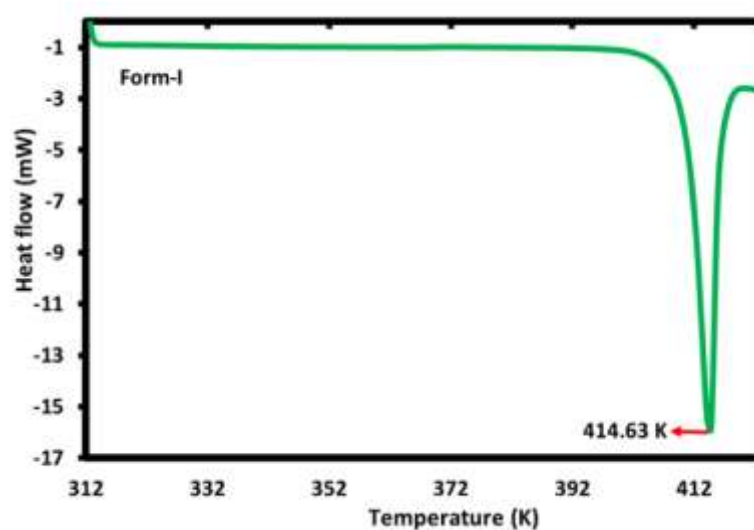

**Fig S4.** Recorded DSC thermogram of the grown aspirin polymorphic Form-I from acetonitrile-rich (0.24W:0.76A) solvent mixing composition through a swift cooling process.

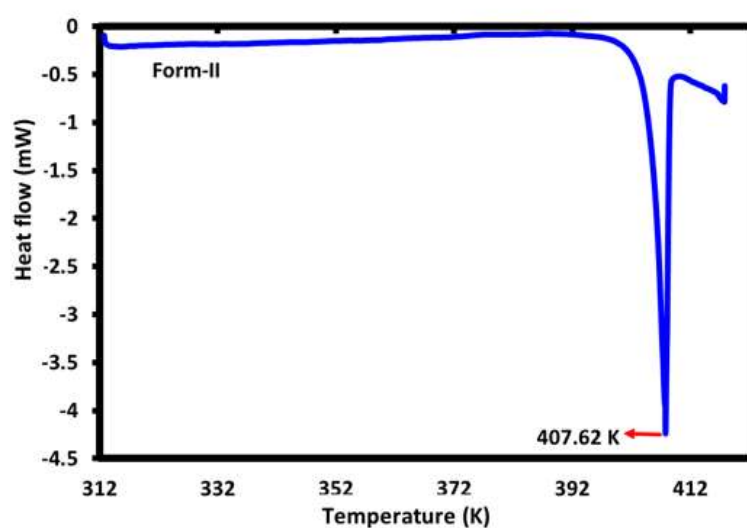

**Fig S5.** Recorded DSC thermogram of the grown aspirin polymorphic Form-II from water-rich (0.96W:0.04A) solvent mixing composition through a swift cooling process.

**Table S1. Lattice parameter values of the grown aspirin polymorphs.**

| Lattice Parameters      | Form-I       |                  | Form-II      |                  |
|-------------------------|--------------|------------------|--------------|------------------|
|                         | Present work | Literature value | Present work | Literature value |
| a (Å)                   | 11.441       | 11.233           | 12.103       | 12.095           |
| b (Å)                   | 6.481        | 6.544            | 6.408        | 6.491            |
| c (Å)                   | 11.161       | 11.231           | 11.319       | 11.323           |
| $\beta$ (°)             | 95.34        | 95.89            | 111.59       | 111.50           |
| Volume (Å) <sup>3</sup> | 816.38       | 821.21           | 824.11       | 827.18           |

**Table S2. Data collection details and refined crystallographic information of Form-I and Form-II polymorphs of aspirin through SCXRD analysis**

| Parameters                        | Form-I                                                                                               | Form-II                                                                                               |
|-----------------------------------|------------------------------------------------------------------------------------------------------|-------------------------------------------------------------------------------------------------------|
| Chemical formula                  | C <sub>9</sub> H <sub>8</sub> O <sub>4</sub>                                                         | C <sub>9</sub> H <sub>8</sub> O <sub>4</sub>                                                          |
| Formula weight                    | 180.15 g/mol                                                                                         | 180.15 g/mol                                                                                          |
| Temperature                       | 296(2) K                                                                                             | 296(2) K                                                                                              |
| Wavelength                        | 0.71073 Å                                                                                            | 0.71073 Å                                                                                             |
| Crystal habit                     | Clear intense white prismatic                                                                        | Clear intense white platy                                                                             |
| Crystal system, space group       | Monoclinic, P2 <sub>1</sub> /c                                                                       | Monoclinic, P2 <sub>1</sub> /c                                                                        |
| Unit cell dimensions              | a=11.429(4) Å, $\alpha$ = 90°<br>b=6.597(2) Å, $\beta$ = 95.750(9)°<br>c=11.395(4) Å, $\gamma$ = 90° | a=12.2633(15) Å, $\alpha$ =90°<br>b=6.5624(8)Å, $\beta$ =111.627(3)°<br>c=11.4726(14)Å, $\gamma$ =90° |
| Volume                            | 854.8(5) Å <sup>3</sup>                                                                              | 858.2(18) Å <sup>3</sup>                                                                              |
| Z                                 | 4                                                                                                    | 4                                                                                                     |
| Reflection Collected/Unique       | 45382/1946 [R(int) = 0.1422]                                                                         | 51801/1915 [R(int) = 0.1492]                                                                          |
| Density                           | 1.400 g/cm <sup>3</sup>                                                                              | 1.394 g/cm <sup>3</sup>                                                                               |
| Absorption Coefficient            | 0.112 mm <sup>-1</sup>                                                                               | 0.111 mm <sup>-1</sup>                                                                                |
| F(000)                            | 376                                                                                                  | 376                                                                                                   |
| Theta range for data collection   | 3.57 to 27.44°                                                                                       | 3.57 to 27.25°                                                                                        |
| Completeness of data              | 99.3%                                                                                                | 99.8%                                                                                                 |
| Refinement Method                 | Full-matrix least-squares on F <sup>2</sup>                                                          | Full-matrix least-squares on F <sup>2</sup>                                                           |
| Goodness-of-fit of F <sup>2</sup> | 1.037                                                                                                | 1.012                                                                                                 |
| Data/restraints/parameters        | 1946 / 0 / 120                                                                                       | 1915 / 0 / 120                                                                                        |
| Final R indices                   | R1 = 0.0524, wR2 = 0.1074                                                                            | R1 = 0.0748, wR2 = 0.1681                                                                             |
| R indices ( all data)             | R1 = 0.1119, wR2 = 0.1246                                                                            | R1 = 0.1545, wR2 = 0.2056                                                                             |
| Largest diff. Peak and hole       | 0.170 and -0.194eÅ <sup>-3</sup>                                                                     | 0.1514 and -0.238 eÅ <sup>-3</sup>                                                                    |
| Reference Number                  | 2164673                                                                                              | 2161484                                                                                               |

**Form-I (CCDC No:2164673)****Table S3. Atomic coordinates and equivalent isotropic atomic displacement parameters ( $\text{\AA}^2$ )**

U(eq) is defined as one third of the trace of the orthogonalized  $U_{ij}$  tensor.

|    | <b>x/a</b>  | <b>y/b</b> | <b>z/c</b>  | <b>U(eq)</b> |
|----|-------------|------------|-------------|--------------|
| O3 | 0.21473(12) | 0.5887(2)  | 0.58794(11) | 0.0410(4)    |
| O1 | 0.37983(13) | 0.8598(2)  | 0.55085(14) | 0.0513(5)    |
| O2 | 0.48955(14) | 0.8120(2)  | 0.40343(13) | 0.0528(5)    |
| O4 | 0.09651(15) | 0.7795(3)  | 0.46551(13) | 0.0614(5)    |
| C7 | 0.40975(17) | 0.7571(3)  | 0.46213(16) | 0.0355(5)    |
| C1 | 0.34702(17) | 0.5643(3)  | 0.43238(17) | 0.0349(5)    |
| C2 | 0.25423(18) | 0.4878(3)  | 0.49045(16) | 0.0369(5)    |
| C8 | 0.13424(19) | 0.7383(3)  | 0.56368(18) | 0.0411(5)    |
| C6 | 0.38307(18) | 0.4499(3)  | 0.34026(18) | 0.0414(5)    |
| C3 | 0.20213(19) | 0.3060(3)  | 0.4584(2)   | 0.0473(6)    |
| C5 | 0.3300(2)   | 0.2688(3)  | 0.3068(2)   | 0.0486(6)    |
| C4 | 0.2402(2)   | 0.1977(4)  | 0.3665(2)   | 0.0507(6)    |
| C9 | 0.1029(2)   | 0.8366(4)  | 0.6731(2)   | 0.0603(7)    |

**Table S4. Bond lengths ( $\text{\AA}$ )**

|       |          |       |          |
|-------|----------|-------|----------|
| O3-C8 | 1.359(3) | O3-C2 | 1.408(2) |
| O1-C7 | 1.292(2) | O1-H1 | 0.82     |
| O2-C7 | 1.238(2) | O4-C8 | 1.189(2) |
| C7-C1 | 1.483(3) | C1-C6 | 1.388(3) |
| C1-C2 | 1.399(3) | C2-C3 | 1.372(3) |
| C8-C9 | 1.480(3) | C6-C5 | 1.377(3) |

|        |      |        |          |
|--------|------|--------|----------|
| C6-H6  | 0.93 | C3-C4  | 1.374(3) |
| C3-H3  | 0.93 | C5-C4  | 1.369(3) |
| C5-H5  | 0.93 | C4-H4  | 0.93     |
| C9-H9A | 0.96 | C9-H9B | 0.96     |
| C9-H9C | 0.96 |        |          |

---

**Table S5. Bond angles (°)**

|            |            |            |            |
|------------|------------|------------|------------|
| C8-O3-C2   | 116.55(15) | C7-O1-H1   | 109.5      |
| O2-C7-O1   | 122.44(19) | O2-C7-C1   | 119.55(18) |
| O1-C7-C1   | 118.00(17) | C6-C1-C2   | 117.27(19) |
| C6-C1-C7   | 117.75(17) | C2-C1-C7   | 124.98(18) |
| C3-C2-C1   | 121.23(19) | C3-C2-O3   | 117.27(18) |
| C1-C2-O3   | 121.41(18) | O4-C8-O3   | 122.11(19) |
| O4-C8-C9   | 126.6(2)   | O3-C8-C9   | 111.27(18) |
| C5-C6-C1   | 121.66(19) | C5-C6-H6   | 119.2      |
| C1-C6-H6   | 119.2      | C2-C3-C4   | 119.7(2)   |
| C2-C3-H3   | 120.2      | C4-C3-H3   | 120.2      |
| C4-C5-C6   | 119.4(2)   | C4-C5-H5   | 120.3      |
| C6-C5-H5   | 120.3      | C5-C4-C3   | 120.7(2)   |
| C5-C4-H4   | 119.6      | C3-C4-H4   | 119.6      |
| C8-C9-H9A  | 109.5      | C8-C9-H9B  | 109.5      |
| H9A-C9-H9B | 109.5      | C8-C9-H9C  | 109.5      |
| H9A-C9-H9C | 109.5      | H9B-C9-H9C | 109.5      |

---

**Table S6. Torsion angles (°)**

|             |             |             |             |
|-------------|-------------|-------------|-------------|
| O2-C7-C1-C6 | 1.5(3)      | O1-C7-C1-C6 | -177.19(19) |
| O2-C7-C1-C2 | -178.78(19) | O1-C7-C1-C2 | 2.5(3)      |
| C6-C1-C2-C3 | 0.8(3)      | C7-C1-C2-C3 | -178.96(19) |
| C6-C1-C2-O3 | 177.37(17)  | C7-C1-C2-O3 | -2.4(3)     |
| C8-O3-C2-C3 | -97.9(2)    | C8-O3-C2-C1 | 85.4(2)     |
| C2-O3-C8-O4 | 1.8(3)      | C2-O3-C8-C9 | -178.11(18) |
| C2-C1-C6-C5 | 0.1(3)      | C7-C1-C6-C5 | 179.85(19)  |
| C1-C2-C3-C4 | -1.0(3)     | O3-C2-C3-C4 | -177.7(2)   |
| C1-C6-C5-C4 | -0.8(3)     | C6-C5-C4-C3 | 0.6(4)      |
| C2-C3-C4-C5 | 0.3(3)      |             |             |

**Table S7. Anisotropic atomic displacement parameters (Å<sup>2</sup>)**

The anisotropic atomic displacement factor exponent takes the form:  $-2\pi^2 [ h^2 a^{*2} U_{11} + \dots + 2 h k a^* b^* U_{12} ]$

|    | <b>U<sub>11</sub></b> | <b>U<sub>22</sub></b> | <b>U<sub>33</sub></b> | <b>U<sub>23</sub></b> | <b>U<sub>13</sub></b> | <b>U<sub>12</sub></b> |
|----|-----------------------|-----------------------|-----------------------|-----------------------|-----------------------|-----------------------|
| O3 | 0.0447(9)             | 0.0479(9)             | 0.0310(8)             | 0.0054(7)             | 0.0075(6)             | 0.0039(7)             |
| O1 | 0.0546(10)            | 0.0505(10)            | 0.0513(10)            | -0.0166(8)            | 0.0167(8)             | -0.0133(8)            |
| O2 | 0.0597(10)            | 0.0534(10)            | 0.0486(9)             | -0.0089(8)            | 0.0221(8)             | -0.0174(8)            |
| O4 | 0.0654(11)            | 0.0806(13)            | 0.0379(9)             | 0.0051(9)             | 0.0032(8)             | 0.0268(9)             |
| C7 | 0.0365(12)            | 0.0400(12)            | 0.0304(11)            | 0.0022(10)            | 0.0056(9)             | 0.0028(9)             |
| C1 | 0.0338(11)            | 0.0373(11)            | 0.0336(11)            | 0.0030(10)            | 0.0030(9)             | 0.0026(9)             |
| C2 | 0.0403(12)            | 0.0393(12)            | 0.0311(11)            | 0.0048(10)            | 0.0038(9)             | 0.0038(10)            |
| C8 | 0.0391(12)            | 0.0485(13)            | 0.0367(12)            | 0.0019(11)            | 0.0078(10)            | -0.0010(11)           |
| C6 | 0.0382(12)            | 0.0448(13)            | 0.0418(12)            | 0.0003(10)            | 0.0075(10)            | 0.0001(10)            |

|    |            |            |            |             |            |             |
|----|------------|------------|------------|-------------|------------|-------------|
| C3 | 0.0440(13) | 0.0445(13) | 0.0543(14) | 0.0076(12)  | 0.0098(11) | -0.0060(11) |
| C5 | 0.0505(14) | 0.0454(14) | 0.0505(14) | -0.0099(11) | 0.0091(11) | 0.0013(11)  |
| C4 | 0.0533(15) | 0.0379(13) | 0.0601(15) | -0.0035(12) | 0.0019(12) | -0.0042(11) |
| C9 | 0.0589(15) | 0.0774(18) | 0.0455(14) | -0.0111(13) | 0.0100(12) | 0.0093(14)  |

**Table S8. Hydrogen atomic coordinates and isotropic atomic displacement parameters ( $\text{\AA}^2$ )**

|     | x/a    | y/b    | z/c    | U(eq) |
|-----|--------|--------|--------|-------|
| H1  | 0.4243 | 0.9568 | 0.5630 | 0.077 |
| H6  | 0.4446 | 0.4969 | 0.3001 | 0.05  |
| H3  | 0.1413 | 0.2563 | 0.4987 | 0.057 |
| H5  | 0.3549 | 0.1953 | 0.2442 | 0.058 |
| H4  | 0.2047 | 0.0748 | 0.3446 | 0.061 |
| H9A | 0.0477 | 0.9439 | 0.6532 | 0.09  |
| H9B | 0.1725 | 0.8914 | 0.7157 | 0.09  |
| H9C | 0.0683 | 0.7383 | 0.7212 | 0.09  |

**Form-II (CCDC-2161484)**

**Table S9. Atomic coordinates and equivalent isotropic atomic displacement parameters ( $\text{\AA}^2$ )**

U(eq) is defined as one third of the trace of the orthogonalized  $U_{ij}$  tensor.

|    | x/a         | y/b       | z/c         | U(eq)     |
|----|-------------|-----------|-------------|-----------|
| O3 | 0.78414(19) | 0.5882(4) | 0.72717(18) | 0.0494(7) |
| O2 | 0.6191(2)   | 0.8595(4) | 0.6088(2)   | 0.0569(7) |
| O1 | 0.5101(2)   | 0.8103(4) | 0.4082(2)   | 0.0593(7) |

|    | x/a       | y/b       | z/c       | U(eq)      |
|----|-----------|-----------|-----------|------------|
| O4 | 0.9040(2) | 0.7804(4) | 0.6661(2) | 0.0618(8)  |
| C7 | 0.5902(3) | 0.7557(5) | 0.5058(3) | 0.0363(8)  |
| C1 | 0.6534(3) | 0.5644(5) | 0.5073(3) | 0.0389(8)  |
| C8 | 0.8650(3) | 0.7404(5) | 0.7439(3) | 0.0448(8)  |
| C2 | 0.7452(3) | 0.4867(5) | 0.6110(3) | 0.0441(8)  |
| C6 | 0.6182(3) | 0.4494(5) | 0.3979(3) | 0.0468(9)  |
| C5 | 0.6714(3) | 0.2669(5) | 0.3912(3) | 0.0518(9)  |
| C3 | 0.7978(3) | 0.3031(6) | 0.6048(3) | 0.0539(10) |
| C4 | 0.7604(3) | 0.1984(6) | 0.4946(4) | 0.0576(10) |
| C9 | 0.8958(4) | 0.8347(8) | 0.8687(3) | 0.0741(13) |

**Table S10. Bond lengths (Å)**

|        |          |        |          |
|--------|----------|--------|----------|
| O3-C8  | 1.370(4) | O3-C2  | 1.407(4) |
| O2-C7  | 1.295(4) | O2-H2  | 0.82     |
| O1-C7  | 1.240(4) | O4-C8  | 1.187(4) |
| C7-C1  | 1.472(4) | C1-C6  | 1.390(4) |
| C1-C2  | 1.399(4) | C8-C9  | 1.477(5) |
| C2-C3  | 1.381(5) | C6-C5  | 1.380(5) |
| C6-H6  | 0.93     | C5-C4  | 1.359(5) |
| C5-H5  | 0.93     | C3-C4  | 1.361(5) |
| C3-H3  | 0.93     | C4-H4  | 0.93     |
| C9-H9A | 0.96     | C9-H9B | 0.96     |
| C9-H9C | 0.96     |        |          |



**Table S11. Bond angles (°)**

---

|            |          |            |          |
|------------|----------|------------|----------|
| C8-O3-C2   | 116.9(2) | C7-O2-H2   | 109.5    |
| O1-C7-O2   | 122.1(3) | O1-C7-C1   | 119.7(3) |
| O2-C7-C1   | 118.2(3) | C6-C1-C2   | 117.0(3) |
| C6-C1-C7   | 117.8(3) | C2-C1-C7   | 125.2(3) |
| O4-C8-O3   | 121.8(3) | O4-C8-C9   | 127.4(3) |
| O3-C8-C9   | 110.7(3) | C3-C2-C1   | 121.3(3) |
| C3-C2-O3   | 117.4(3) | C1-C2-O3   | 121.2(3) |
| C5-C6-C1   | 121.7(3) | C5-C6-H6   | 119.1    |
| C1-C6-H6   | 119.1    | C4-C5-C6   | 118.9(3) |
| C4-C5-H5   | 120.6    | C6-C5-H5   | 120.6    |
| C4-C3-C2   | 119.0(3) | C4-C3-H3   | 120.5    |
| C2-C3-H3   | 120.5    | C5-C4-C3   | 122.1(4) |
| C5-C4-H4   | 119.0    | C3-C4-H4   | 119.0    |
| C8-C9-H9A  | 109.5    | C8-C9-H9B  | 109.5    |
| H9A-C9-H9B | 109.5    | C8-C9-H9C  | 109.5    |
| H9A-C9-H9C | 109.5    | H9B-C9-H9C | 109.5    |

---

**Table S12. Torsion angles (°)**

---

|             |           |             |          |
|-------------|-----------|-------------|----------|
| O1-C7-C1-C6 | -1.3(4)   | O2-C7-C1-C6 | 177.1(3) |
| O1-C7-C1-C2 | 179.8(3)  | O2-C7-C1-C2 | -1.7(4)  |
| C2-O3-C8-O4 | -2.7(5)   | C2-O3-C8-C9 | 179.0(3) |
| C6-C1-C2-C3 | -0.4(4)   | C7-C1-C2-C3 | 178.5(3) |
| C6-C1-C2-O3 | -177.6(3) | C7-C1-C2-O3 | 1.3(5)   |
| C8-O3-C2-C3 | 97.8(3)   | C8-O3-C2-C1 | -84.9(3) |

|             |          |             |           |
|-------------|----------|-------------|-----------|
| C2-C1-C6-C5 | -0.2(5)  | C7-C1-C6-C5 | -179.2(3) |
| C1-C6-C5-C4 | 0.2(5)   | C1-C2-C3-C4 | 1.1(5)    |
| O3-C2-C3-C4 | 178.4(3) | C6-C5-C4-C3 | 0.6(6)    |
| C2-C3-C4-C5 | -1.2(6)  |             |           |

---

**Table S13. Anisotropic atomic displacement parameters ( $\text{\AA}^2$ )**

The anisotropic atomic displacement factor exponent takes the form:  $-2\pi^2 [ h^2 a^{*2} U_{11} + \dots + 2 h k a^* b^* U_{12} ]$

|    | $U_{11}$   | $U_{22}$   | $U_{33}$   | $U_{23}$    | $U_{13}$   | $U_{12}$    |
|----|------------|------------|------------|-------------|------------|-------------|
| O3 | 0.0540(14) | 0.0602(16) | 0.0308(12) | 0.0010(11)  | 0.0121(10) | -0.0029(12) |
| O2 | 0.0595(16) | 0.0580(17) | 0.0471(14) | -0.0113(12) | 0.0125(12) | 0.0119(12)  |
| O1 | 0.0666(16) | 0.0628(17) | 0.0395(14) | -0.0012(12) | 0.0089(13) | 0.0136(13)  |
| O4 | 0.0642(16) | 0.079(2)   | 0.0453(14) | -0.0075(13) | 0.0238(13) | -0.0165(14) |
| C7 | 0.0375(17) | 0.0375(19) | 0.0316(17) | -0.0004(15) | 0.0100(14) | -0.0040(14) |
| C1 | 0.0399(17) | 0.0416(19) | 0.0363(17) | -0.0001(15) | 0.0151(14) | -0.0047(15) |
| C8 | 0.0403(19) | 0.054(2)   | 0.0366(19) | 0.0002(16)  | 0.0096(15) | 0.0017(16)  |
| C2 | 0.0472(19) | 0.045(2)   | 0.0399(18) | 0.0051(16)  | 0.0155(15) | -0.0042(16) |
| C6 | 0.0459(19) | 0.051(2)   | 0.0410(19) | -0.0011(16) | 0.0132(15) | -0.0019(17) |
| C5 | 0.054(2)   | 0.049(2)   | 0.050(2)   | -0.0081(18) | 0.0171(18) | -0.0037(17) |
| C3 | 0.048(2)   | 0.060(2)   | 0.050(2)   | 0.0095(19)  | 0.0139(17) | 0.0056(18)  |
| C4 | 0.058(2)   | 0.052(2)   | 0.065(3)   | -0.001(2)   | 0.024(2)   | 0.0039(19)  |
| C9 | 0.068(3)   | 0.106(4)   | 0.048(2)   | -0.024(2)   | 0.022(2)   | -0.012(2)   |

---

**Table S14. Hydrogen atomic coordinates and isotropic atomic displacement parameters ( $\text{\AA}^2$ )**

|     | <b>x/a</b> | <b>y/b</b> | <b>z/c</b> | <b>U(eq)</b> |
|-----|------------|------------|------------|--------------|
| H2  | 0.5704     | 0.9492     | 0.6009     | 0.085        |
| H6  | 0.5571     | 0.4967     | 0.3273     | 0.056        |
| H5  | 0.6469     | 0.1921     | 0.3172     | 0.062        |
| H3  | 0.8579     | 0.2518     | 0.6748     | 0.065        |
| H4  | 0.7968     | 0.0760     | 0.4900     | 0.069        |
| H9A | 0.9439     | 0.9524     | 0.8744     | 0.111        |
| H9B | 0.9379     | 0.7382     | 0.9322     | 0.111        |
| H9C | 0.8254     | 0.8749     | 0.8808     | 0.111        |
